# Supplementary material for: Profiling and Preparation of Metabolites from Pyragrel in Human Urine by Online Solid-Phase Extraction Coupled with High Performance Liquid Chromatography Tandem Mass Spectrometry Followed by a Macroporous Resin-Based Purification Approach
Source: PubMed Central journal article supplement (PMC6155396; doi:10.3390/molecules22030494), 2017-03-21
Supplement: molecules-22-00494-s001.pdf [file molecules-22-00494-s001.pdf]

# Profiling and Preparation of Metabolites from Pyragrel in Human Urine by Online Solid-Phase Extraction Coupled with High Performance Liquid Chromatography Tandem Mass Spectrometry Followed by a Macroporous Resin-Based Purification Approach

Xin Zhao <sup>1,†</sup>, Jingjing Jiang <sup>2,†</sup>, Guang Yang <sup>2</sup>, Jie Huang <sup>3</sup>, Guoping Yang <sup>3</sup>, Guangwei He <sup>4</sup>, Zhaoxing Chu <sup>4</sup>, Taijun Hang <sup>1,\*</sup> and Guorong Fan <sup>2,5,6,\*</sup>

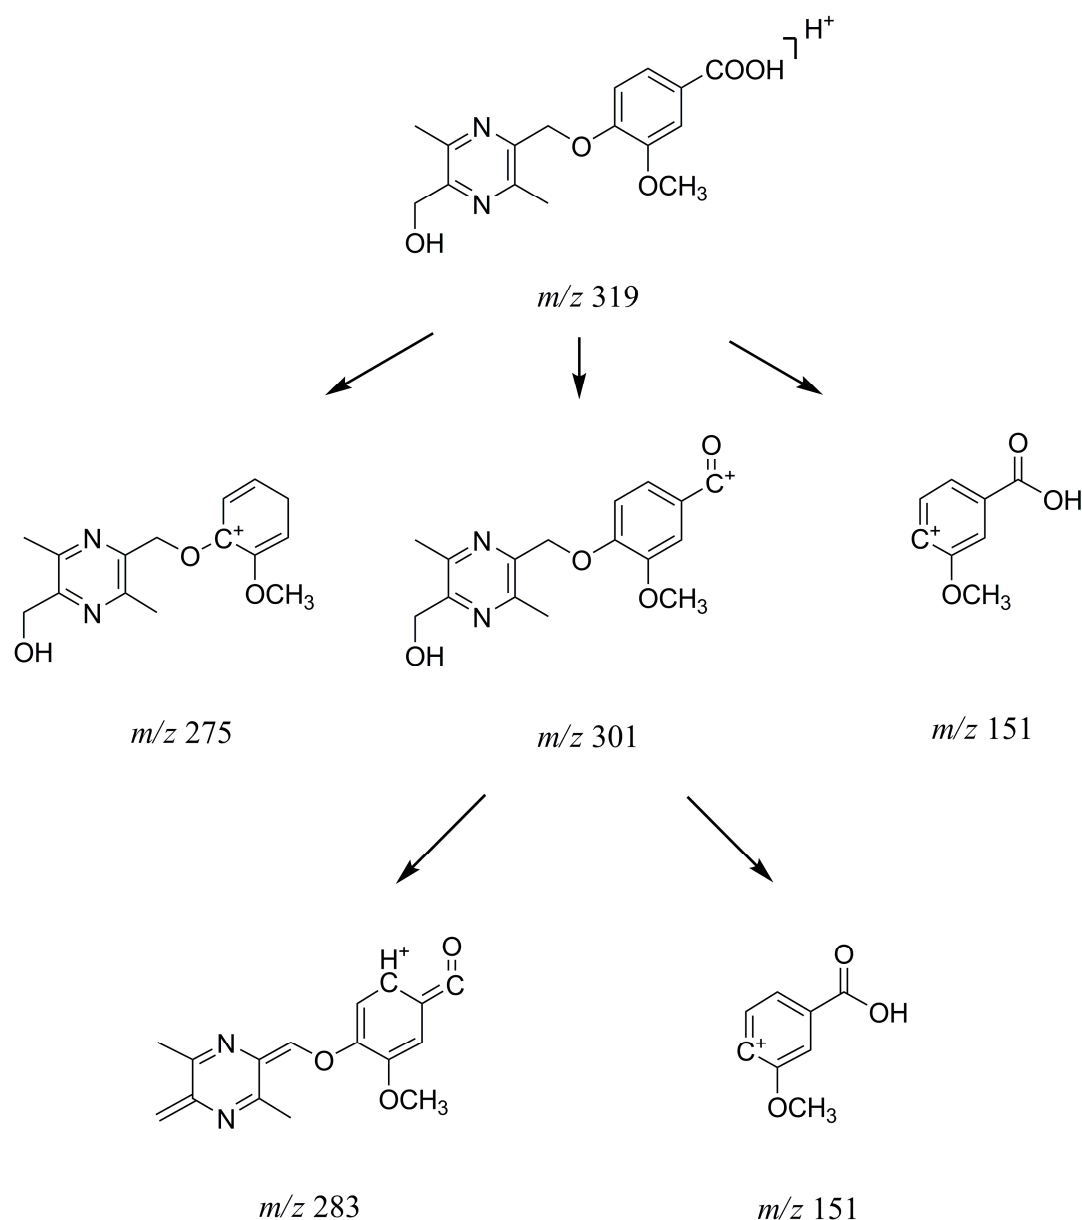

Fig. S1 Inferred fragmentation patterns of metabolite M2.

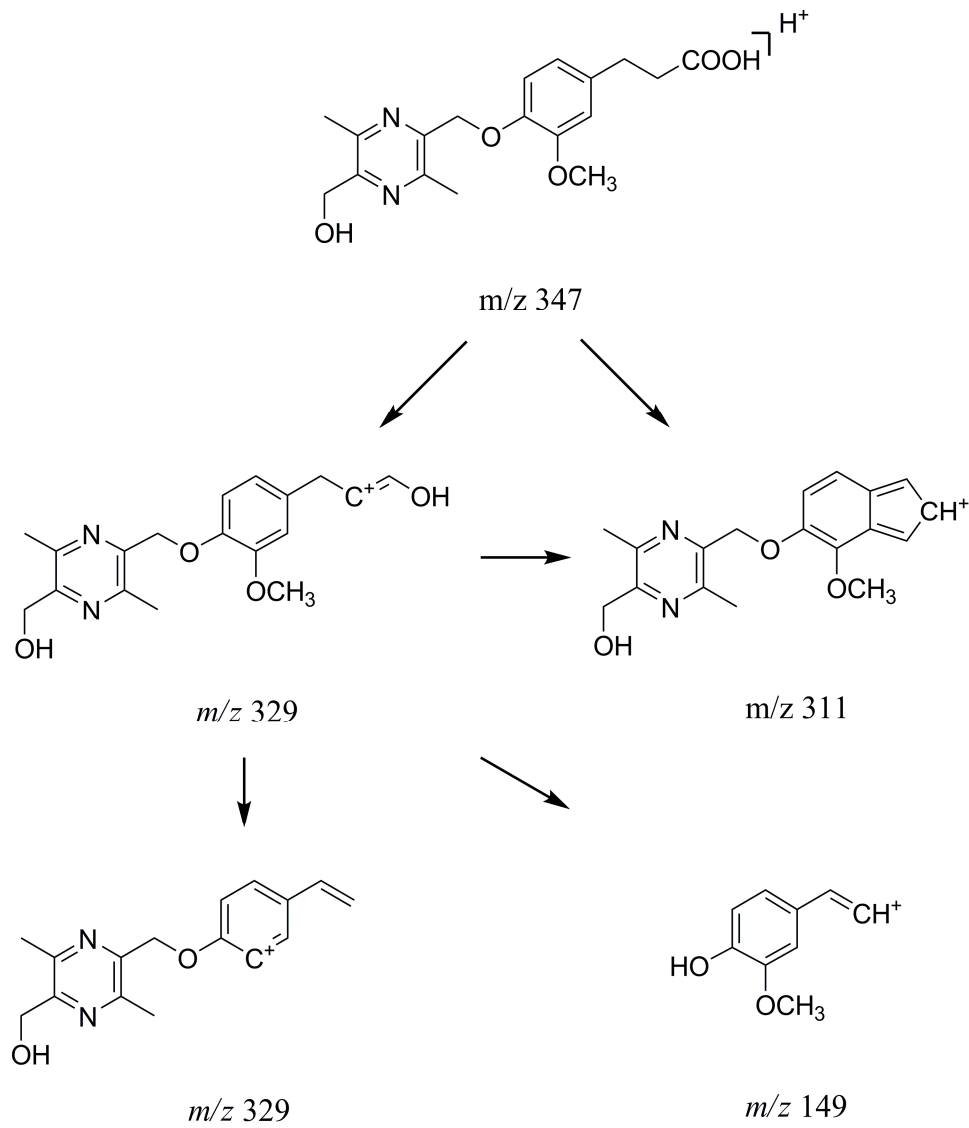

**Fig. S2** Inferred fragmentation patterns of metabolite M3.

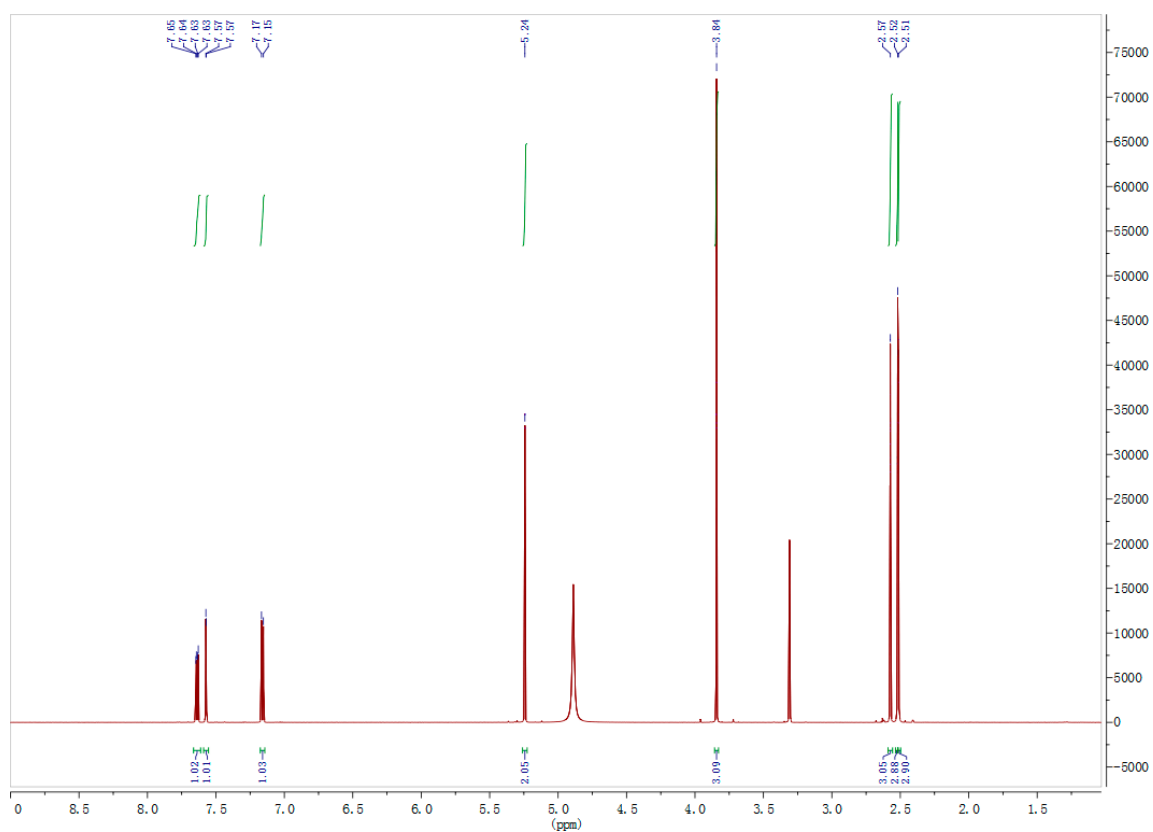

Fig. S3  $^1\text{H}$  NMR spectrum of metabolite M4.

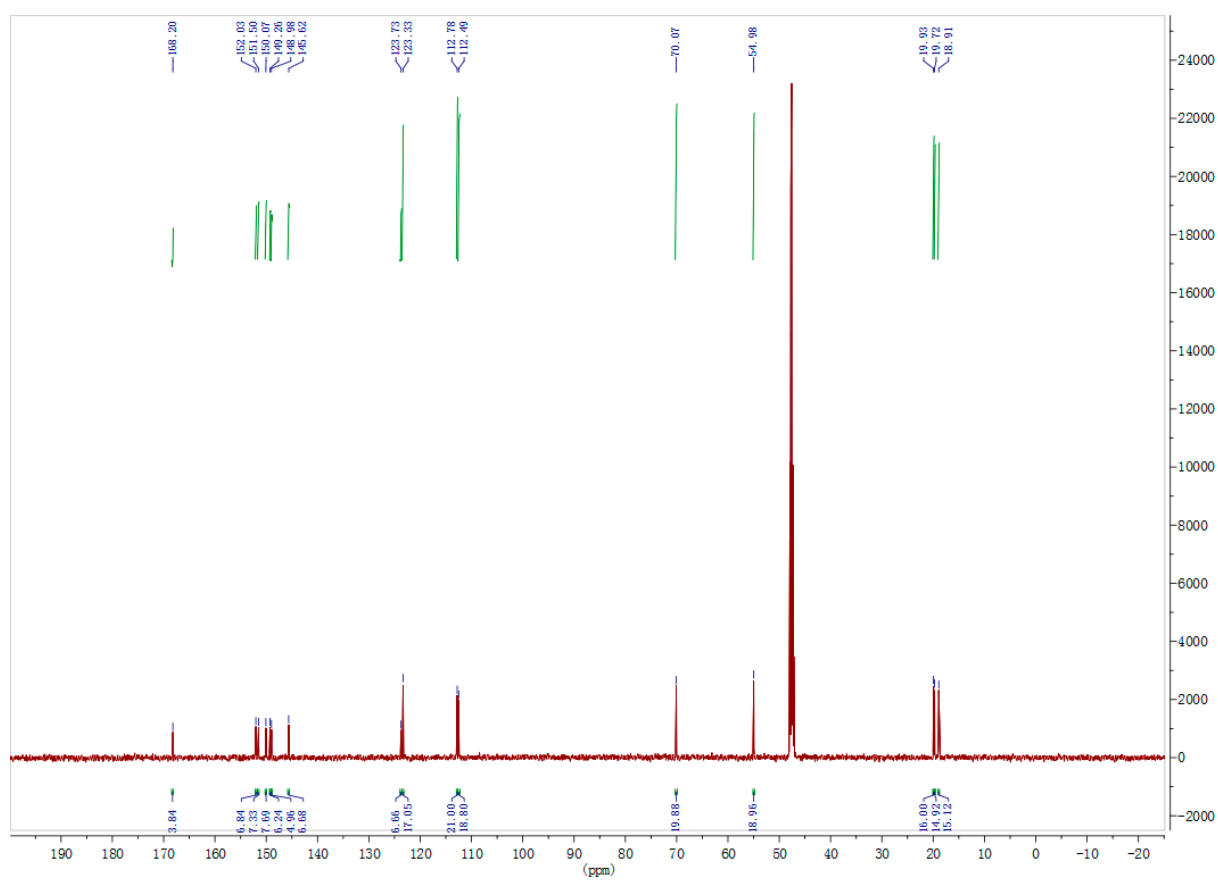

Fig. S4  $^{13}\text{C}$  NMR spectrum of metabolite M4.

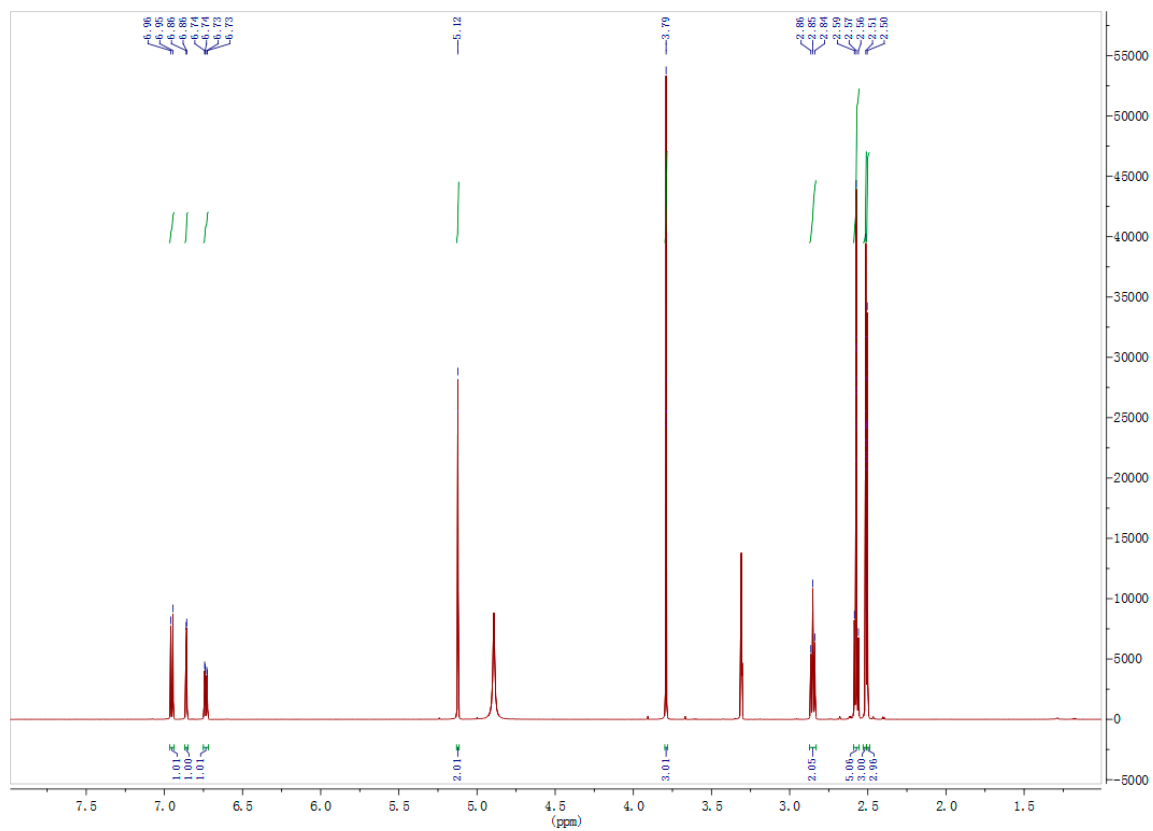

**Fig. S5**  $^1\text{H}$  NMR spectrum of metabolite M5.

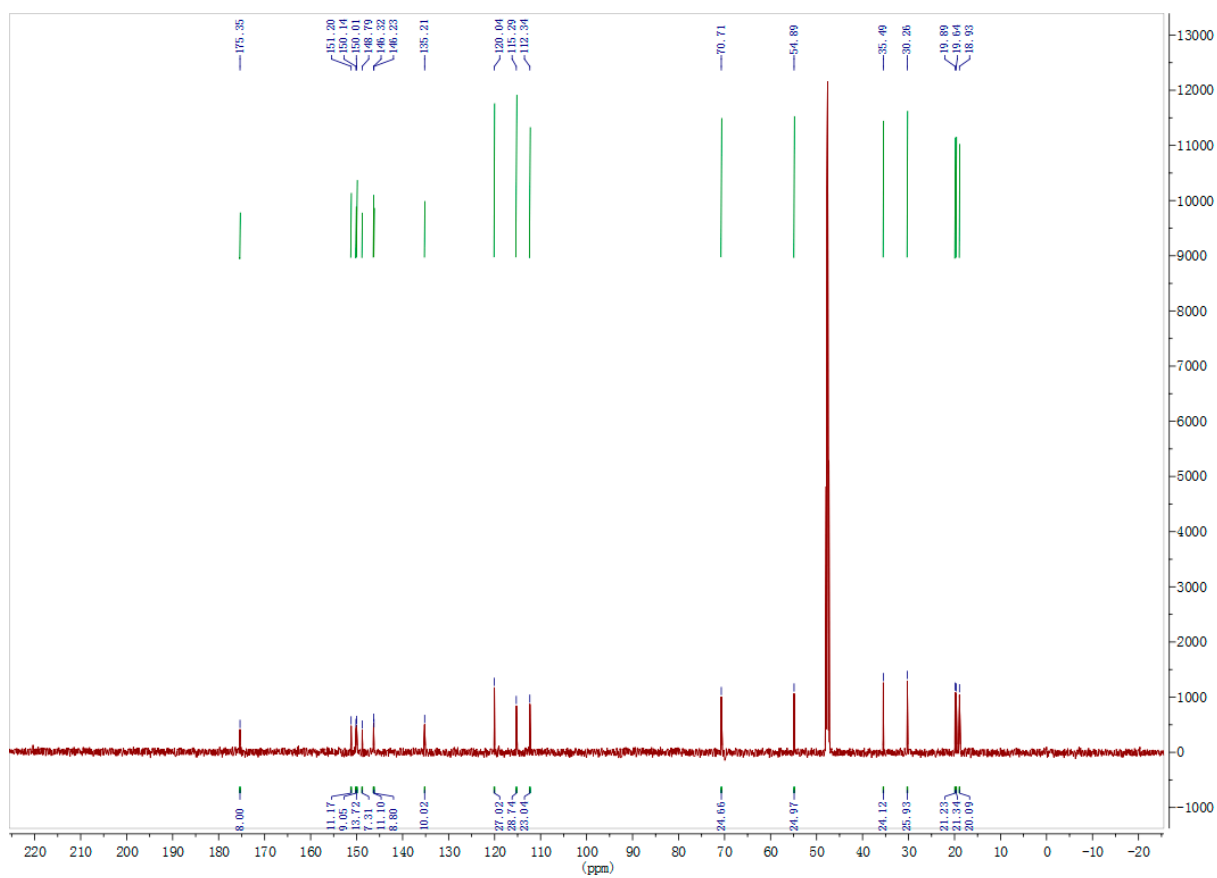

**Fig. S6**  $^{13}\text{C}$  NMR spectrum of metabolite M5.
